# Supplementary material for: Release Mechanism, Secondary Pollutants and Denitrification Performance Comparison of Six Kinds of Agricultural Wastes as Solid Carbon Sources for Nitrate Removal
Source: PubMed Central journal article supplement (PMC7908289; doi:10.3390/ijerph18031232), 2021-01-29
Supplement: ijerph-18-01232-s001.pdf [file ijerph-18-01232-s001.pdf]

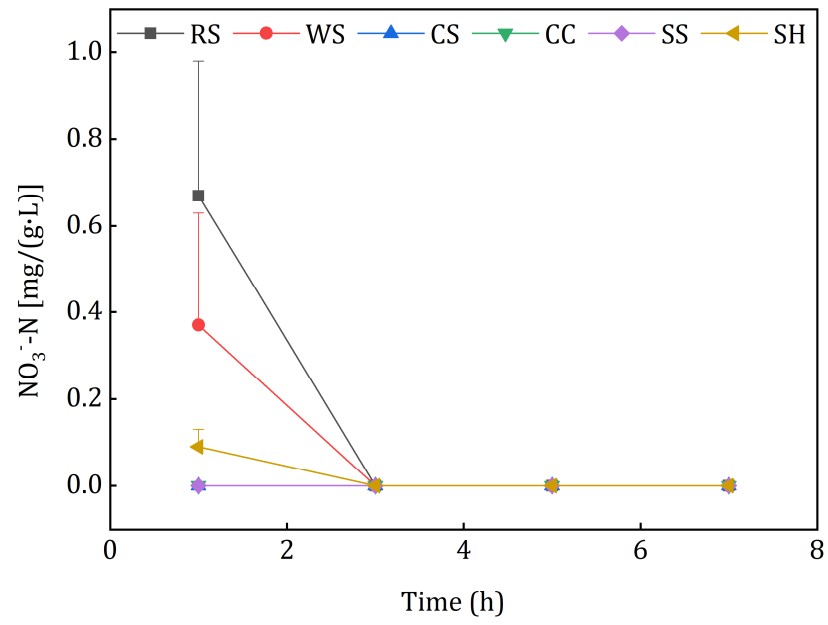

**Figure S1.** Release curves of  $\text{NO}_3^-$ -N from the investigated agricultural wastes
